# Supplementary material for: Comprehensive immune profiling reveals substantial immune system alterations in a subset of patients with amyotrophic lateral sclerosis
Source: PubMed Central journal article supplement (PMC5526569; doi:10.1371/journal.pone.0182002), 2017-07-25
Supplement: pone.0182002.s001.pdf [file pone.0182002.s001.pdf]

A

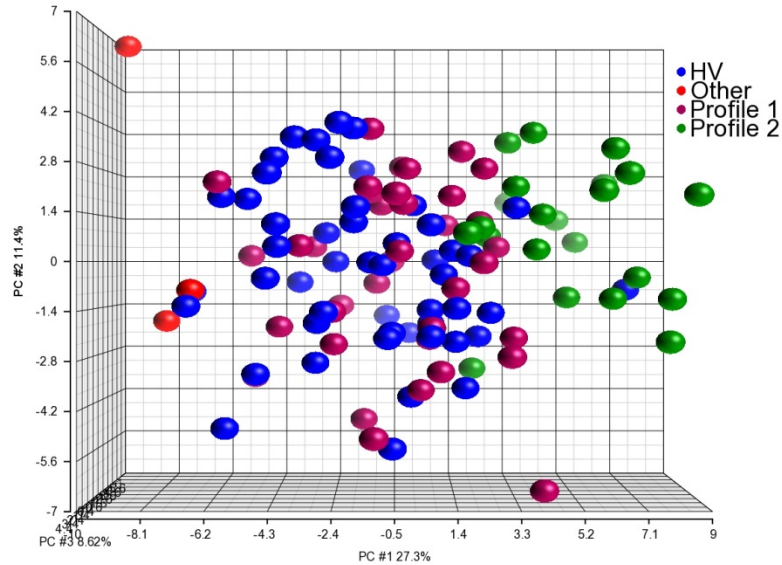

B

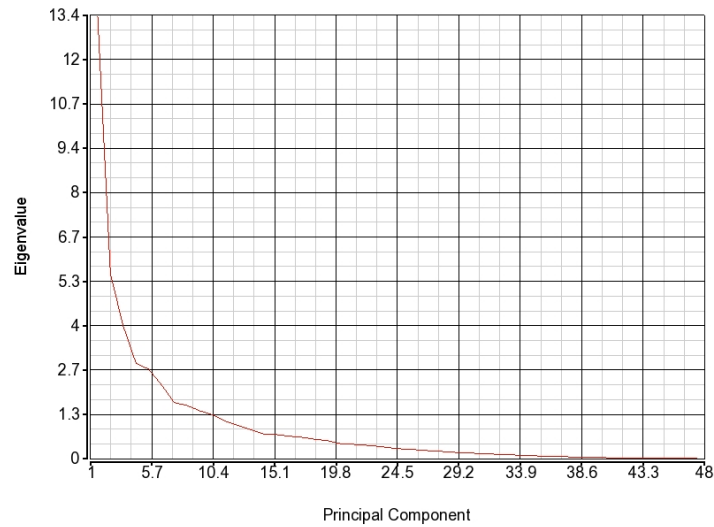

C

| PC1        |             | PC2               |             | PC3                |             |
|------------|-------------|-------------------|-------------|--------------------|-------------|
| Phenotype  | Correlation | Phenotype         | Correlation | Phenotype          | Correlation |
| CD3+       | 0.9221      | CD3+CD56+         | 0.5060      | CD14+CD16- HLA-DR  | 0.7314      |
| CD4+       | 0.8362      | CD8+CD45RA+       | 0.4983      | CD14+CD16+ HLA-DR  | 0.7056      |
| CD4+CD28+  | 0.8147      | CD8+              | 0.4846      | CD14loCD16+ HLA-DR | 0.6900      |
| CD4+PD1-   | 0.7792      | CD8+PD1-          | 0.4839      | CD14loCD16-        | 0.4773      |
| CD8+CD28+  | 0.7503      | CD8+CD28+         | 0.4447      | CD14+CD16+         | 0.4351      |
| CD8+       | 0.7454      | CD4+CD8+          | 0.3364      | LINDR+             | 0.4282      |
| CD19+      | 0.7285      | CD8+PD1+          | 0.3149      | MoDC               | 0.3839      |
| Tregs      | 0.7256      | CD14+CD16- HLA-DR | 0.2593      | CD8+PD1+           | 0.3084      |
| CD19+CD21+ | 0.7040      | gd T cells        | 0.2366      | CD4+PD1+           | 0.2790      |
| CD8+PD1-   | 0.6722      | CD8Tem            | 0.2360      | CD4Tem             | 0.2707      |

**S1 Fig. Associations of phenotypes with principal components.** **A.** Principal components scatter plot of HVs and ALS patients by profile. For graphical purposes HVs were colored differently (Blue spheres) than ALS patients. All but two HVs were categorized into Profile 1. ALS patients were colored by profile: Profile 1= purple spheres; Profile 2 = green spheres; and Other (did not cluster into a distinct group) = red spheres. **B.** Eigenvalues that correspond to the variation found in the principal components. The largest eigenvalues are associated with most of the covariation observed in the data set. **C.** For the correlation matrix, the top ten immunophenotypes associated with each principal component are listed.
