# Supplementary material for: Comprehensive immune profiling reveals substantial immune system alterations in a subset of patients with amyotrophic lateral sclerosis
Source: PubMed Central journal article supplement (PMC5526569; doi:10.1371/journal.pone.0182002), 2017-07-25
Supplement: pone.0182002.s002.pdf [file pone.0182002.s002.pdf]

**S1 Table: Comparison of immunophenotypes between healthy volunteer controls and ALS patients.**

| Phenotype                                             | HVs     |         |       | ALS     |         |       | P value  | sig | Discovery? |
|-------------------------------------------------------|---------|---------|-------|---------|---------|-------|----------|-----|------------|
|                                                       | Minimum | Maximum | Mean  | Minimum | Maximum | Mean  |          |     |            |
| SShiCD15+ Granulocytes (cells/μl)#                    | 1570    | 5689    | 3007  | 1589    | 10711   | 4024  | 0.000042 | *   | Yes        |
| CD15+CD16+ Neutrophils (cells/μl)                     | 1487    | 5557    | 2802  | 1440    | 6481    | 3556  | 0.000258 | *   | Yes        |
| CD15+CD16- Eosinophils (cells/μl)                     | 43.47   | 1240    | 198.9 | 8.15    | 487     | 153.5 | 0.123051 |     | No         |
| Mononuclear cells (cells/μl)                          | 1210    | 4001    | 2073  | 981.4   | 4768    | 2667  | 0.000021 | *   | Yes        |
| CD14+ Monocytes (cells/μl)#                           | 245.4   | 838.5   | 490.8 | 153     | 1245    | 519.8 | 0.355138 |     | No         |
| CD14+CD16- Classical Monocytes (cells/μl)             | 184.9   | 702.6   | 408.1 | 157.3   | 986.6   | 441.4 | 0.224147 |     | No         |
| CD14+CD16+ Intermediate Monocytes (cells/μl)          | 11.56   | 77.83   | 35.1  | 8.86    | 134.6   | 33.16 | 0.607277 |     | No         |
| CD14loCD16+ Non-Classical Monocytes (cells/μl)        | 20.97   | 78.67   | 41.38 | 12.19   | 151.8   | 47.01 | 0.185053 |     | No         |
| Lymphocytes (cells/μl)                                | 822.5   | 3403    | 1577  | 780.3   | 4073    | 2133  | 0.00001  | *   | Yes        |
| CD3+ T cells (cells/μl)#                              | 460.2   | 2461    | 1090  | 565.3   | 3103    | 1461  | 0.000086 | *   | Yes        |
| CD4+ T cells (cells/μl)#                              | 307.7   | 1883    | 764.2 | 360.5   | 2227    | 997   | 0.000309 | *   | Yes        |
| CD8+ T cells (cells/μl)#                              | 88.7    | 571.7   | 294.1 | 38.63   | 1308    | 413.6 | 0.003012 | *   | Yes        |
| CD4+CD8+ T cells (cells/μl)                           | 1.48    | 34.29   | 9.858 | 1.25    | 258     | 26.71 | 0.004934 | *   | Yes        |
| CD4-CD8- T cells (cells/μl)                           | 4.9     | 56.92   | 23.2  | 5.11    | 194.2   | 40.03 | 0.006146 | *   | Yes        |
| CD4/CD8 ratio#                                        | 0.98    | 10.42   | 3.085 | 0.53    | 14.27   | 3.292 | 0.584853 |     | No         |
| CD3+CD56+ NKT cells (cells/μl)#                       | 2.2     | 170.8   | 36.09 | 0.44    | 579.7   | 81.11 | 0.000863 | *   | Yes        |
| CD3+CD56+ NKT cells (% of CD3+)#                      | 0.34    | 14.62   | 3.366 | 0.07    | 23.49   | 5.193 | 0.01075  | *   | Yes        |
| gamma delta T cells (cells/μl)                        | 2.49    | 46.56   | 15.4  | 1.6     | 184.1   | 33.09 | 0.003629 | *   | Yes        |
| gamma delta T cells (% of CD3+)                       | 0.28    | 4.03    | 1.392 | 0.12    | 7.92    | 2.092 | 0.02607  | *   | Yes        |
| CD19+ B cells (cells/μl)#                             | 63.89   | 657.8   | 202.7 | 66.26   | 511.1   | 238.5 | 0.080178 |     | No         |
| CD56+CD16+ NK cells (cells/μl)#                       | 51.8    | 436.9   | 181.9 | 64.27   | 898.5   | 243   | 0.005503 | *   | Yes        |
| CD16+CD56- NK cells (cells/μl)                        | 7.06    | 43.85   | 21.37 | 1.54    | 117.4   | 23.93 | 0.39645  |     | No         |
| CD56+CD16+ NK cells (cells/μl)                        | 34.63   | 375.5   | 163.9 | 58.26   | 882.7   | 223   | 0.010625 | *   | Yes        |
| CD56+CD16- NK cells (cells/μl)                        | 6.9     | 61.45   | 17.95 | 6.01    | 70.46   | 20    | 0.30348  |     | No         |
| Lineage neg cells (cells/μl)                          | 35.48   | 171     | 79.83 | 24.63   | 218.4   | 83.43 | 0.507227 |     | No         |
| CD4+CD25+CD127lo Tregs (% of CD4+ T cells)            | 4.85    | 14.74   | 9.131 | 4.65    | 15.98   | 9.257 | 0.798762 |     | No         |
| CD4+CD45RA+ (% of CD4+ T cells)                       | 7.57    | 71.23   | 42.49 | 10.22   | 72.35   | 40.21 | 0.391058 |     | No         |
| CD4+CD45RO+ (% of CD4+ T cells)                       | 8.97    | 91.13   | 53.09 | 25      | 88.24   | 56.39 | 0.246014 |     | No         |
| CD4+CD45RO+CD62L+CCR7+ Tcm (% of CD4+CD45RO+ T cells) | 28.22   | 80.02   | 61.98 | 37.79   | 85.81   | 63.21 | 0.585035 |     | No         |
| CD4+CD45RO+CD62L-CCR7- Tem (% of CD4+CD45RO+ T cells) | 5.4     | 53.2    | 17.92 | 4.3     | 44.2    | 16.44 | 0.451882 |     | No         |
| CD4+CD45RA+CD62L+CD27+                                | 76.82   | 99.79   | 94.27 | 46.1    | 99.83   | 92.71 | 0.383328 |     | No         |
| CD4+CD25+ (% of CD4+ T cells)                         | 12.36   | 53.19   | 29.39 | 2.04    | 84.82   | 31.27 | 0.519229 |     | No         |
| CD4+CD69+ (% of CD4+ T cells)                         | 0.73    | 46.64   | 9.369 | 0.98    | 30.89   | 8.744 | 0.729823 |     | No         |
| CD8+CD45RA+ (% of CD8+ T cells)                       | 23.81   | 81.79   | 56.2  | 22.3    | 90.25   | 53.55 | 0.356893 |     | No         |
| CD8+CD45RO+ (% of CD8+ T cells)                       | 1.59    | 75.41   | 41.02 | 8.95    | 77.3    | 44.86 | 0.20659  |     | No         |
| CD8+CD45RO+CD62L+CCR7+ Tcm (% of CD8+CD45RO+ T cells) | 4.38    | 47.73   | 23.12 | 6.24    | 42.59   | 22.37 | 0.665672 |     | No         |
| CD8+CD45RO+CD62L-CCR7- Tem (% of CD8+CD45RO+ T cells) | 28.29   | 88.43   | 53.77 | 29.83   | 78.71   | 52.54 | 0.606539 |     | No         |

|                                                          |       |       |        |       |       |        |          |   |     |
|----------------------------------------------------------|-------|-------|--------|-------|-------|--------|----------|---|-----|
| CD8+CD45RA+CD62L+CD27+ (% of CD8+CD45RA+)                | 9.34  | 89.09 | 52.21  | 8.79  | 94.56 | 43.98  | 0.067497 |   | No  |
| CD8+CD45RA+CD62L-CD27- Temra (% of CD8+CD45RA+)          | 0.23  | 45.1  | 14.36  | 0.43  | 61.86 | 17.33  | 0.291855 |   | No  |
| CD8+CD25+ (% of CD8+ T cells)                            | 0.62  | 14.53 | 4.88   | 0.57  | 65.61 | 10.44  | 0.003601 | * | Yes |
| CD8+CD69+ (% of CD8+ T cells)                            | 1.43  | 24    | 6.243  | 1.44  | 21.59 | 5.479  | 0.323901 |   | No  |
| CD8+CD45RA+CD62L+CD27+CCR7+ Tscm (% of CD8+CD45RA+CD27+) | 2.93  | 66.66 | 24.33  | 2.8   | 54.19 | 17.54  | 0.01272  | * | Yes |
| CD4+CTLA4+ (% of CD4+ T cells)                           | 0.01  | 3.42  | 0.4308 | 0     | 3.15  | 0.3572 | 0.567599 |   | No  |
| CD4+CD28+CTLA4+ (% of CD4+ T cells)                      | 0.06  | 12.26 | 1.586  | 0     | 15.78 | 2.663  | 0.049923 | * | No  |
| CD4+CD28+ (% of CD4+ T cells)                            | 59.75 | 99.21 | 91.44  | 71.92 | 99.37 | 92.01  | 0.700046 |   | No  |
| CD8+CTLA4+ (% of CD4+ T cells)                           | 0     | 10.29 | 0.3835 | 0     | 2.5   | 0.2272 | 0.455088 |   | No  |
| CD8+CD28+CTLA4+ (% of CD8+ T cells)                      | 0     | 10.49 | 1.096  | 0     | 7.71  | 1.269  | 0.660268 |   | No  |
| CD8+CD28+ (% of CD8+ T cells)                            | 47.45 | 99.08 | 87.11  | 58.57 | 99.57 | 86.49  | 0.812437 |   | No  |
| CD4+TIM-3+ (% of CD4+ T cells)                           | 0.2   | 10.12 | 1.563  | 0.2   | 17.04 | 2.836  | 0.064667 |   | No  |
| CD4+PD-1+TIM-3+ (% of CD4+ T cells)                      | 0.12  | 6.52  | 1.036  | 0.1   | 9.97  | 1.627  | 0.10767  |   | No  |
| CD4+PD-1+(% of CD4+ T cells)                             | 6.92  | 40.66 | 20.47  | 5.86  | 40.88 | 20.05  | 0.797587 |   | No  |
| CD8+TIM-3+ (% of CD8+ T cells)                           | 0.02  | 3.07  | 0.54   | 0.02  | 6.57  | 1.101  | 0.020879 | * | Yes |
| CD8+PD-1+TIM-3+ (% of CD8+ T cells)                      | 0.08  | 13.15 | 1.285  | 0.02  | 15.52 | 2.713  | 0.020197 | * | Yes |
| CD8+PD-1+ (% of CD8+ T cells)                            | 18.93 | 71.88 | 37.58  | 8.25  | 75.57 | 37.16  | 0.879212 |   | No  |
| CD4+BTLA+ (% of CD4+ T cells)                            | 56.75 | 92.36 | 81.45  | 58.63 | 93.84 | 80.41  | 0.46179  |   | No  |
| CD4+BTLA PE Geometric Mean                               | 0.61  | 4.01  | 2.193  | 0.5   | 4.7   | 2.178  | 0.931017 |   | No  |
| CD8+BTLA+ (% of CD8+ T cells)                            | 32.77 | 91.48 | 66.68  | 35.18 | 85.83 | 62.8   | 0.171564 |   | No  |
| CD8+ BTLA PE Geometric Mean                              | 0.29  | 4.74  | 1.676  | 0.48  | 4.54  | 1.463  | 0.251403 |   | No  |
| CD19+CD21- Gated (% of CD19+ B cells)                    | 2.82  | 40.58 | 9.074  | 1.75  | 48.96 | 9.395  | 0.816204 |   | No  |
| CD19+CD21pos+ (% of CD19+ B cells)                       | 59.42 | 97.18 | 90.93  | 51.04 | 98.25 | 90.61  | 0.816204 |   | No  |
| CD19+CD27+ (% of CD19+ B cells)                          | 9.26  | 54.26 | 26.82  | 9.13  | 80.79 | 28.46  | 0.513475 |   | No  |
| CD19+IgM+ % Gated (% of CD19+ B cells)                   | 22.08 | 92.05 | 72.09  | 15.61 | 94.35 | 59.54  | 0.000811 | * | Yes |
| CD19+CD24+IgM- Plasma (% of CD19+ B cells)               | 7.91  | 61.61 | 26.03  | 4.77  | 76.94 | 35.23  | 0.004116 | * | Yes |
| CD19+CD24+IgM+ Transitional (% of CD19+ B cells)         | 20.48 | 91.49 | 69.5   | 18.04 | 93.85 | 61.35  | 0.023329 | * | Yes |
| CD19+IgD+IgM+ (% of CD19+CD27+)                          | 3.46  | 35.04 | 11.16  | 3.37  | 47.37 | 11.43  | 0.845768 |   | No  |
| CD19+IgD-IgM+ (% of CD19+CD27+)                          | 0.37  | 15.63 | 4.789  | 0.41  | 36.44 | 5.543  | 0.447415 |   | No  |
| CD19+IgD-IgM- (% of CD19+CD27+)                          | 3.08  | 26.29 | 10.2   | 1.38  | 31.97 | 10.21  | 0.99111  |   | No  |
| CD14+CD86+ (% of CD14+)                                  | 88.75 | 99.49 | 96.72  | 77.19 | 99.72 | 95.66  | 0.098496 |   | No  |
| CD14+CD80+ (% of CD14+)                                  | 0.13  | 9.91  | 1.661  | 0.11  | 13.32 | 1.463  | 0.618809 |   | No  |
| CD14+CD16- Classical (% of CD14+)                        | 62.98 | 92.52 | 79.97  | 69.95 | 93.93 | 81.54  | 0.117203 |   | No  |
| Classical HLA-DR PacBlu Geometric Mean                   | 0.84  | 6.35  | 3.552  | 0.98  | 7.41  | 3.307  | 0.35191  |   | No  |
| CD14+CD16+ Intermediate (% of CD14+)                     | 1.96  | 29.37 | 7.955  | 1.49  | 16.68 | 7.156  | 0.284271 |   | No  |
| Intermediate HLA-DR PacBlu Geometric Mean                | 3.07  | 37.25 | 19.15  | 1.87  | 35.19 | 15.09  | 0.0155   | * | Yes |
| CD14dimCD16+ Non-classical (% of CD14+)                  | 2.01  | 17.48 | 7.421  | 1.61  | 16.44 | 6.32   | 0.090371 |   | No  |
| Non-Classical HLA-DR PacBlu Geometric Mean               | 3.14  | 18.57 | 8.593  | 1.55  | 18.82 | 8.558  | 0.960308 |   | No  |
| CD14+CD142+ (% of CD14+)                                 | 0.07  | 6.54  | 1.02   | 0.09  | 10.79 | 1.177  | 0.58129  |   | No  |

|                                                                                    |       |       |        |       |       |        |          |   |     |
|------------------------------------------------------------------------------------|-------|-------|--------|-------|-------|--------|----------|---|-----|
| CD14+HLA-DRlo/neg (% of CD14+)                                                     | 2.2   | 62.31 | 15.26  | 1.43  | 55.07 | 16.91  | 0.50686  |   | No  |
| CD14+ HLA-DR PacBlu Geometric Mean                                                 | 0.97  | 7.52  | 4.099  | 1.17  | 6.82  | 3.7    | 0.187278 |   | No  |
| Classical CD86 APC Geometric Mean                                                  | 3.05  | 12.44 | 7.04   | 2.09  | 13.67 | 6.143  | 0.068108 |   | No  |
| Intermediate CD86 APC Geometric Mean                                               | 0.88  | 33.5  | 14.45  | 0.72  | 32.68 | 12.07  | 0.079479 |   | No  |
| Non-Classical CD86 APC Geometric Mean                                              | 0.11  | 44.04 | 14.44  | 0.11  | 44.71 | 12.62  | 0.305381 |   | No  |
| Classical CD80 FITC Geometric Mean                                                 | 0.48  | 1.29  | 0.791  | 0.36  | 1.29  | 0.6386 | 0.00147  | * | Yes |
| Intermediate CD80 FITC Geometric Mean                                              | 0.53  | 1.5   | 0.9625 | 0.41  | 1.59  | 0.7924 | 0.003817 | * | Yes |
| Non-Classical CD80 FITC Geometric Mean                                             | 0.41  | 2.74  | 0.9588 | 0.3   | 6.15  | 0.8392 | 0.391558 |   | No  |
| CD14+ CD32 PerCP-e710 Geometric Mean                                               | 0.11  | 7.44  | 4.57   | 1.06  | 8.15  | 4.324  | 0.464909 |   | No  |
| Neutrophils (% of CD15+)                                                           | 54.22 | 98.09 | 86.38  | 48.83 | 98.62 | 86.11  | 0.892084 |   | No  |
| Eosinophils (% of CD15+)                                                           | 1.69  | 38.02 | 11.94  | 1.16  | 48    | 11.44  | 0.769954 |   | No  |
| CD203c+ Basophils (% of CD45+)                                                     | 0.03  | 0.59  | 0.1647 | 0.01  | 6.18  | 0.2416 | 0.509143 |   | No  |
| CD203c+CCR3+CD63+ (% of CD203c+)                                                   | 8.45  | 91.13 | 40.54  | 3.65  | 90.2  | 36.01  | 0.261777 |   | No  |
| CD203c+CCR3-CD63- (% of CD203c+)                                                   | 6.28  | 90.61 | 55.51  | 9.8   | 95.96 | 59.82  | 0.282064 |   | No  |
| CCR3+CD49d+ Eosinophils (% of Eosinophils)                                         | 34.68 | 97.92 | 83.23  | 9.46  | 96.28 | 74.58  | 0.008135 | * | Yes |
| CCR3-CD49d- Eosinophils (% of Eosinophils)                                         | 0.65  | 46.96 | 8.314  | 1.14  | 48.77 | 13.04  | 0.018968 | * | Yes |
| CCR3+CD49d+ Eosinophils CD44 PerCp PC5.5 Geometric Mean                            | 5.53  | 21.85 | 11.35  | 2.01  | 17.65 | 11.12  | 0.716807 |   | No  |
| CCR3-CD49d+ Eosinophils CD44 PerCp PC5.5 Geometric Mean                            | 0.5   | 3.79  | 1.094  | 0.25  | 4.16  | 1.318  | 0.158716 |   | No  |
| Neutrophils CD66b FITC Geometric Mean                                              | 6.85  | 18.56 | 12.16  | 5.64  | 19.38 | 10.22  | 0.000861 | * | Yes |
| CCR3+CD49d+ Eosinophils CD66b FITC Geometric Mean                                  | 13.14 | 32.8  | 21.77  | 10.22 | 33.31 | 20.19  | 0.163387 |   | No  |
| CCR3-CD49d- Eosinophils] CD66b FITC Geometric Mean                                 | 0.89  | 8.89  | 1.834  | 0.51  | 6.15  | 1.65   | 0.388147 |   | No  |
| CD15+ G-MDSC (% of Mononuclear cells)                                              | 0.09  | 4.03  | 0.6304 | 0.06  | 2.91  | 0.564  | 0.587069 |   | No  |
| G-MDSC CD66b FITC Geometric Mean                                                   | 0.23  | 6.75  | 1.588  | 0.16  | 7.95  | 1.582  | 0.983861 |   | No  |
| LIN-CD33+HLA-DR- (CD11b++CD16-CD15-CD66b-) Immature MDSCs (% of Mononuclear cells) | 0.16  | 5.63  | 2.526  | 0.05  | 5.01  | 2.019  | 0.009094 | * | Yes |
| Lineage(-)DR+ (% of Mononuclear cells)                                             | 1.31  | 5.87  | 3.262  | 0.57  | 4.79  | 2.463  | 0.000066 | * | Yes |
| LIN-DR+CD33+CD11c++CD16+ (% of Lineage(-)DR+)                                      | 9.87  | 77.23 | 50.24  | 0.28  | 82.46 | 39.92  | 0.008679 | * | Yes |
| LIN-DR+CD33+CD11c++CD16- (% of Lineage(-)DR+)                                      | 7.91  | 77.3  | 28.8   | 7.65  | 90.18 | 38.51  | 0.006025 | * | Yes |
| LIN-DR+CD11c dim (% of Lineage(-)DR+)                                              | 1.58  | 12.26 | 3.994  | 0.47  | 32.48 | 4.873  | 0.256504 |   | No  |
| CD11cdimCD123br (% of Lineage(-)DR+)                                               | 4.05  | 31.03 | 15.51  | 1.95  | 46.72 | 14.73  | 0.614179 |   | No  |
| CD15+SSClo (% of Mononuclear cells)                                                | 0.2   | 25.81 | 4      | 0.07  | 43.43 | 4.916  | 0.513796 |   | No  |
| CD15+SSCloCD66b+ (% of CD15+)                                                      | 0.03  | 6.61  | 1.061  | 0     | 6.17  | 1.04   | 0.926508 |   | No  |
| Classical TNFR2 PE Geometric Mean                                                  | 0.13  | 13.65 | 4.201  | 0.33  | 12.5  | 3.798  | 0.493665 |   | No  |
| Intermediate TNFR2 PE Geometric Mean                                               | 0.41  | 18.96 | 8.326  | 1.16  | 16.52 | 7.413  | 0.302125 |   | No  |
| Non-Classical TNFR2 PE Geometric Mean                                              | 1.87  | 21.05 | 8.74   | 1.87  | 23.1  | 8.515  | 0.774692 |   | No  |
| Classical CD40 APC Geometric Mean                                                  | 0.53  | 1.41  | 0.8492 | 0.44  | 2.34  | 0.8188 | 0.49303  |   | No  |
| Intermediate CD40 APC Geometric Mean                                               | 0.82  | 9.89  | 2.52   | 0.26  | 6.83  | 2.097  | 0.150457 |   | No  |
| Non-Classical CD40 APC Geometric Mean                                              | 0.11  | 8.01  | 2.699  | 0.11  | 7.39  | 3.326  | 0.144861 |   | No  |

# Includes 17 patients performed with 4-color flow protocols
